# Supplementary material
Source: publisher site journal article supplement (https://www.dovepress.com/article/493818)
Supplement: Supplementary file 1 [file get_supplementary_file.php]

**
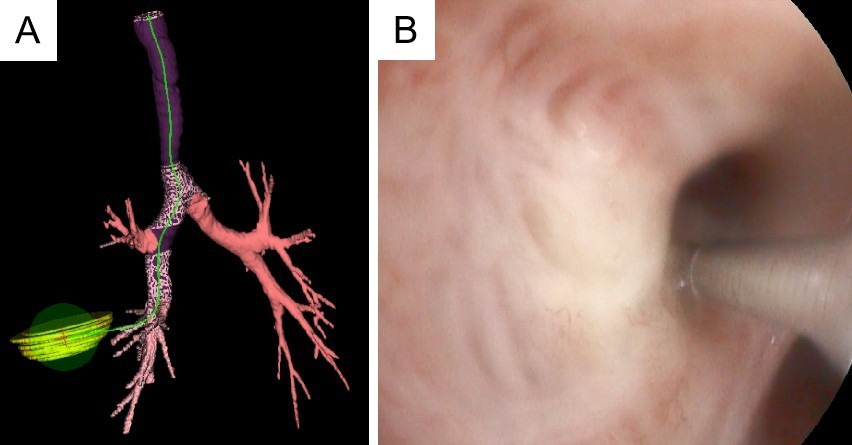
**

**Supplementary Figure 1 .** The preoperative planning of the pathway to pulmonary bullae is depicted in (A), while (B) indicates the precise location for needle insertion during surgery.


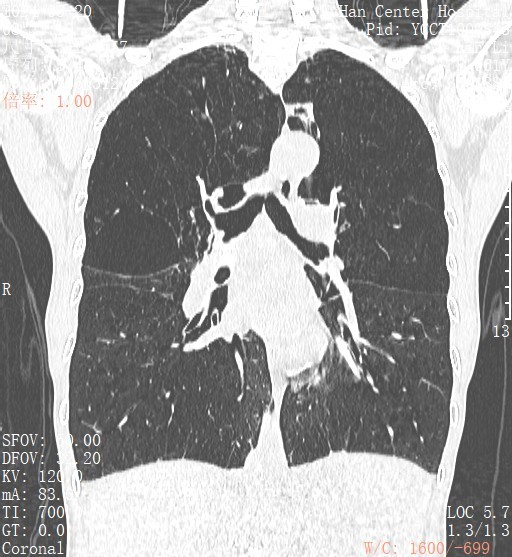


**Supplementary Figure 2.** The first image of figure 2 corresponds to the perioperative image.
